# Supplementary material for: Identification of Suitable Reference Genes for Gene Expression Normalization in qRT-PCR Analysis in Watermelon
Source: PubMed Central journal article supplement (PMC3938773; doi:10.1371/journal.pone.0090612), 2014-02-28
Supplement: pone.0090612.s001.pdf [file pone.0090612.s001.pdf]

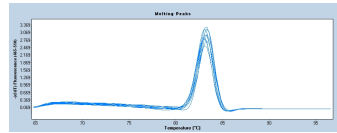

*CICT*

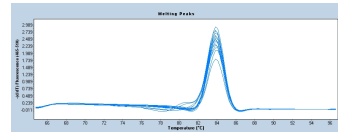

*CICAC*

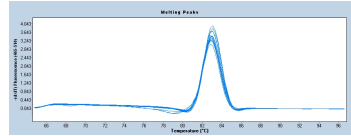

*CIEF1α*

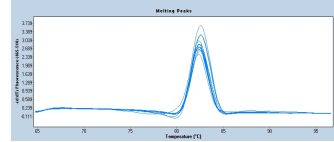

*CIGAPDH*

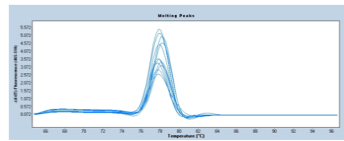

*CIIDH*

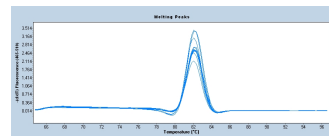

*CILUG*

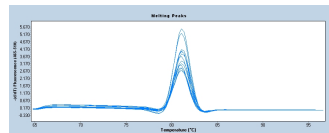

*CIPP2A*

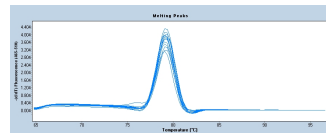

*CIPTB*

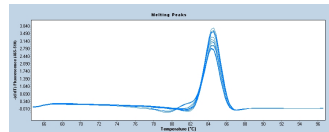

*CIRPS2*

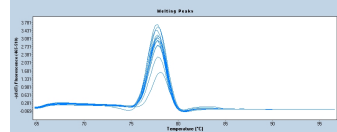

*CISAND*

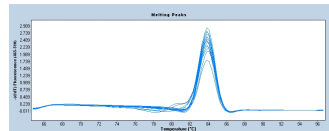

*CITUA*

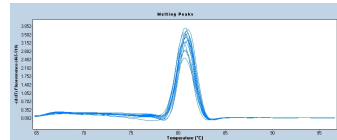

*CIUBC2*

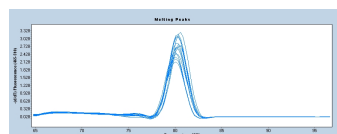

*CIUBCP*

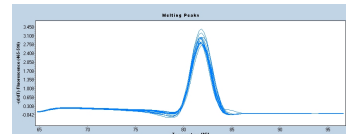

*CIYLS8*

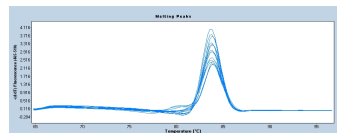

*CI18SrRNA*

**Fig. S1** Melting curve analyses on the candidate reference genes
