# Supplementary material for: Identification of Suitable Reference Genes for Gene Expression Normalization in qRT-PCR Analysis in Watermelon
Source: PubMed Central journal article supplement (PMC3938773; doi:10.1371/journal.pone.0090612), 2014-02-28
Supplement: pone.0090612.s002.pdf [file pone.0090612.s002.pdf]

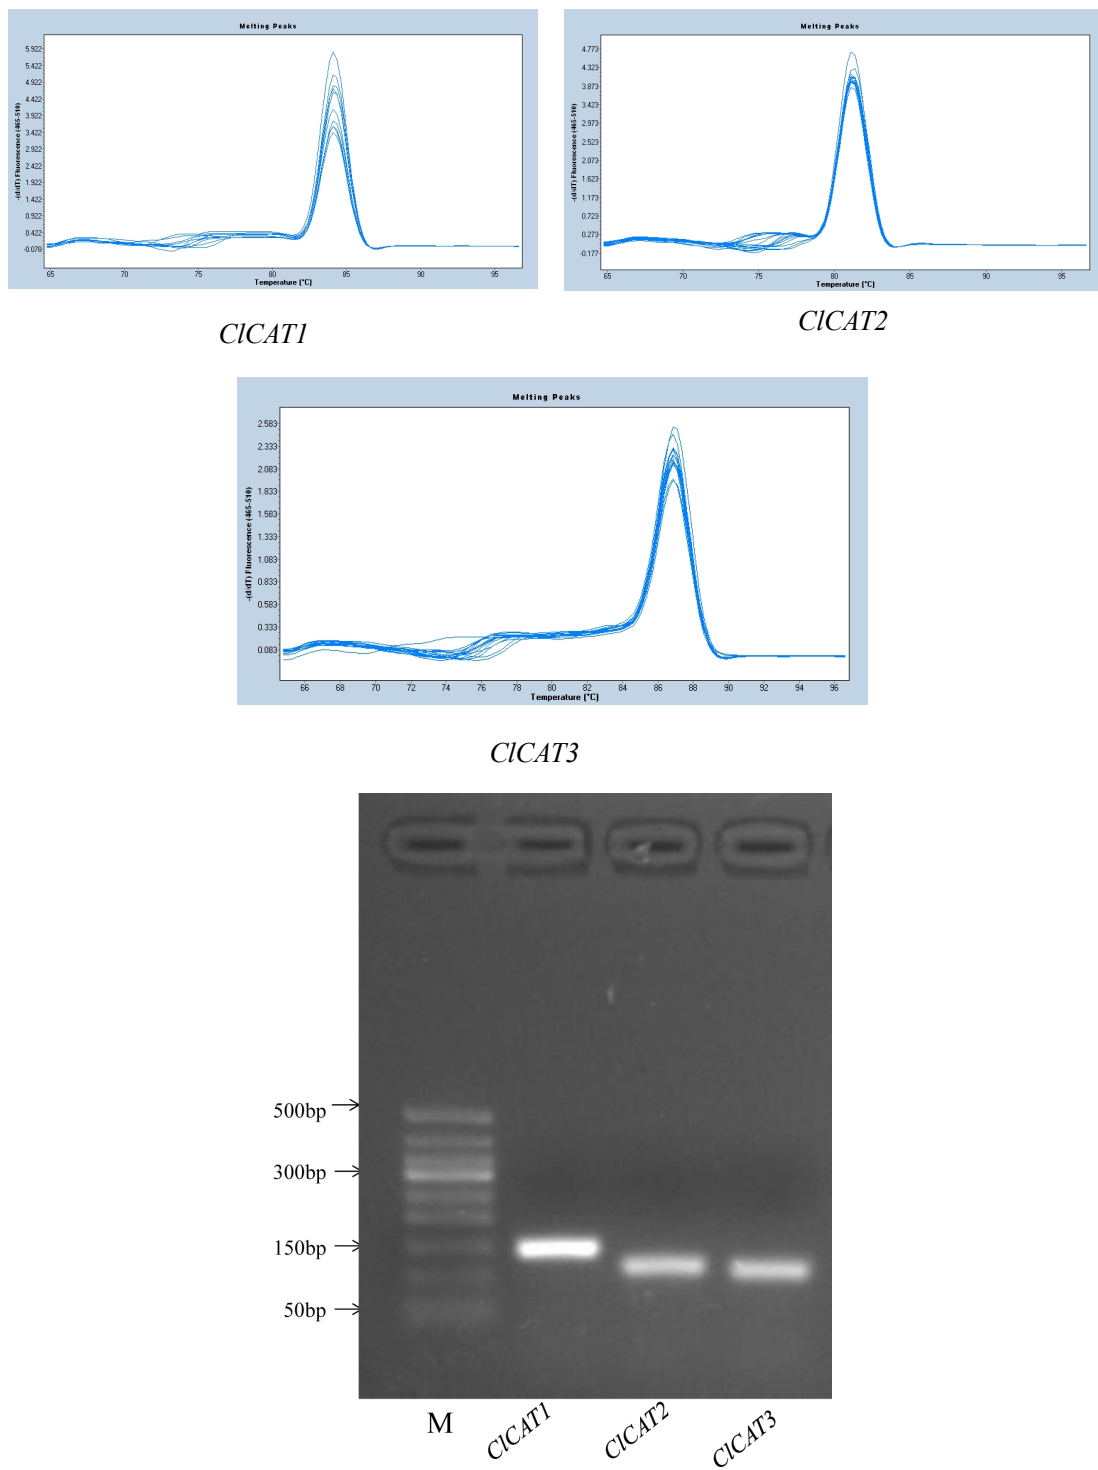

**Fig. S2** Amplification specificity of watermelon genes belonging to the catalase family, as confirmed by electrophoresis in 2% agarose gel and melting curve analysis
