# Supplementary material for: Identification of Suitable Reference Genes for Gene Expression Normalization in qRT-PCR Analysis in Watermelon
Source: PubMed Central journal article supplement (PMC3938773; doi:10.1371/journal.pone.0090612), 2014-02-28
Supplement: pone.0090612.s003.pdf [file pone.0090612.s003.pdf]

**Table S1** Description of watermelon catalase family genes

| Gene name     | Arabidopsis          |                            |         |                       |                               |                               | Product   |
|---------------|----------------------|----------------------------|---------|-----------------------|-------------------------------|-------------------------------|-----------|
|               | Gene ID <sup>a</sup> | homolog locus <sup>b</sup> | E-value | Identity <sup>c</sup> | Forward primer sequence 5'-3' | Reverse primer sequence 5'-3' | size (bp) |
| <i>CICAT1</i> | Cla023448            | AT1G20630                  | 0       | 87%                   | F:GCTCACCATGCCGAGAGGTATC      | R:CGTTCCTGCCTGTCTGATGTCC      | 137       |
| <i>CICAT2</i> | Cla023447            | AT4G35090                  | 0       | 92%                   | F:ACAACCTCTCGATGACCGTTGG      | R:GACAACACGCTCTGGAATACGC      | 110       |
| <i>CICAT3</i> | Cla021932            | AT1G20620                  | 0       | 71%                   | F:TTCTCCACCGTCATCCACGAG       | R:CTAAGTCGAAGTTGCCTTCACG      | 100       |

a, Watermelon gene ID in Cucurbit Genomics Database (<http://www.icugi.org>)

b, Arabidopsis gene ID in TAIR database (<http://www.arabidopsis.org/>)

c, The identity data are the results of blastp.
